# Supplementary material for: Kinase-independent role of cyclin D1 in chromosomal instability and mammary tumorigenesis
Source: PubMed Central journal article supplement (PMC4496164; doi:10.18632/oncotarget.3267), 2015-03-25
Supplement: oncotarget-06-8525-s001.pdf [file oncotarget-06-8525-s001.pdf]

SUPPLEMENTARY FIGURES AND TABLES

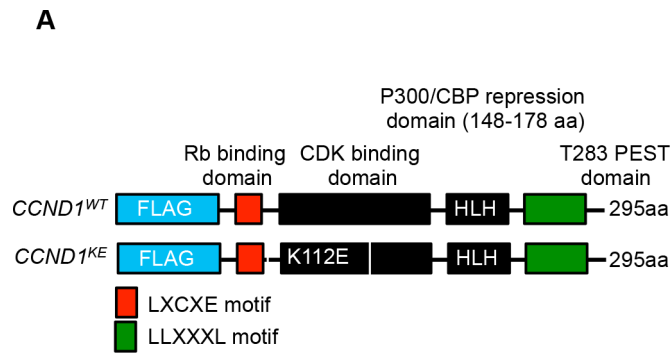

**B**

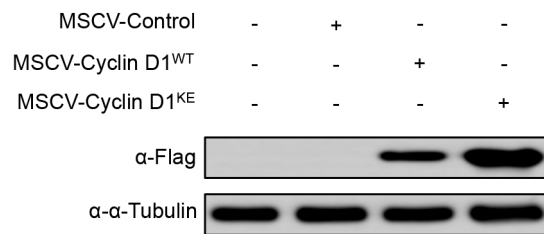

**Supplementary Figure 1: Structure of Cyclin D1<sup>WT</sup> and cyclin D1<sup>KE</sup> vectors and comparison of their abundance in rescued 3T3 cells. (A)** Schematic representation of Cyclin D1<sup>WT</sup> and cyclin D1<sup>KE</sup> proteins. **(B)** Western blot analysis on randomly cycling *cyclin D1*<sup>-/-</sup> and *cyclin D1*<sup>-/-Control</sup>, *cyclin D1*<sup>-/-D1 Rescue</sup> and *cyclin D1*<sup>-/-KE Rescue</sup> cells using anti-FLAG and anti- $\alpha$  Tubulin.

(Continued)

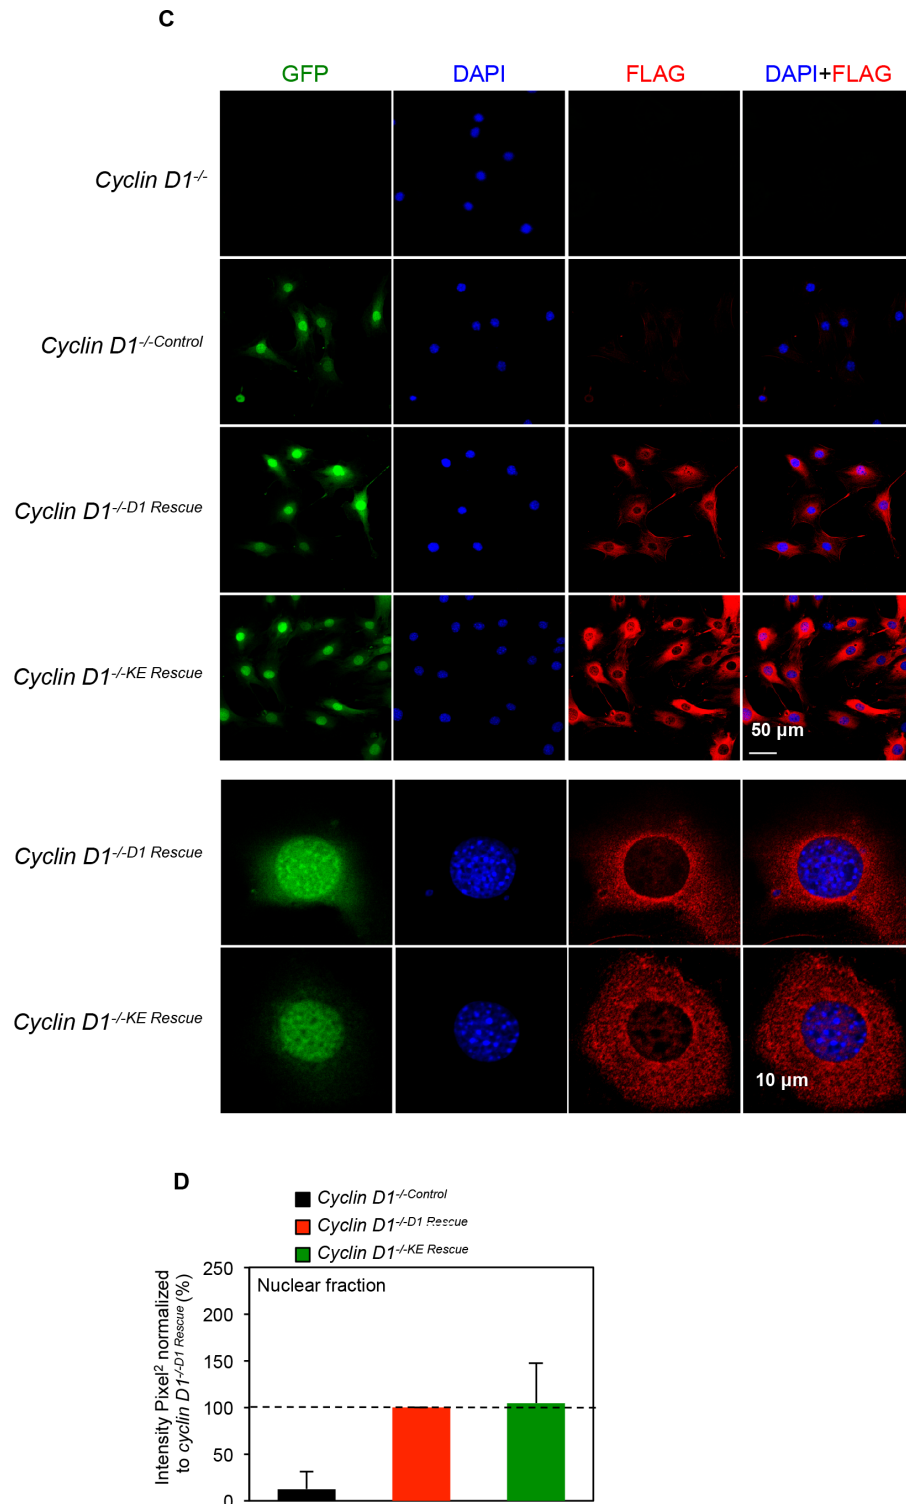

**Supplementary Figure 1: (Continued) Structure of Cyclin D1<sup>WT</sup> and cyclin D1<sup>KE</sup> vectors and comparison of their abundance in rescued 3T3 cells. (C)** Representative images of *cyclin D1<sup>-/-Control</sup>*, *cyclin D1<sup>-/-D1 Rescue</sup>* or *cyclin D1<sup>-/-KE Rescue</sup>* 3T3 fibroblast cells stained for DAPI (blue) and anti-FLAG (red) to the N-terminal FLAG-tag of cyclin D1 to discern subcellular distribution by IHC, scale bars 50  $\mu$ m (upper panels) and 10  $\mu$ m (lower panels). **(D)** Average fluorescent intensity of anti-FLAG signal in *cyclin D1<sup>-/-Control</sup>*, *cyclin D1<sup>-/-D1 Rescue</sup>* *cyclin D1<sup>-/-KE Rescue</sup>* 3T3 cells ( $n = 25$  cells) within the nuclear compartment. Signal intensity from nuclear compartment normalized to cyclin D1<sup>WT</sup>. No statistical difference was observed between cyclin D1<sup>WT</sup> or cyclin D1<sup>KE</sup> localization in the two lines.

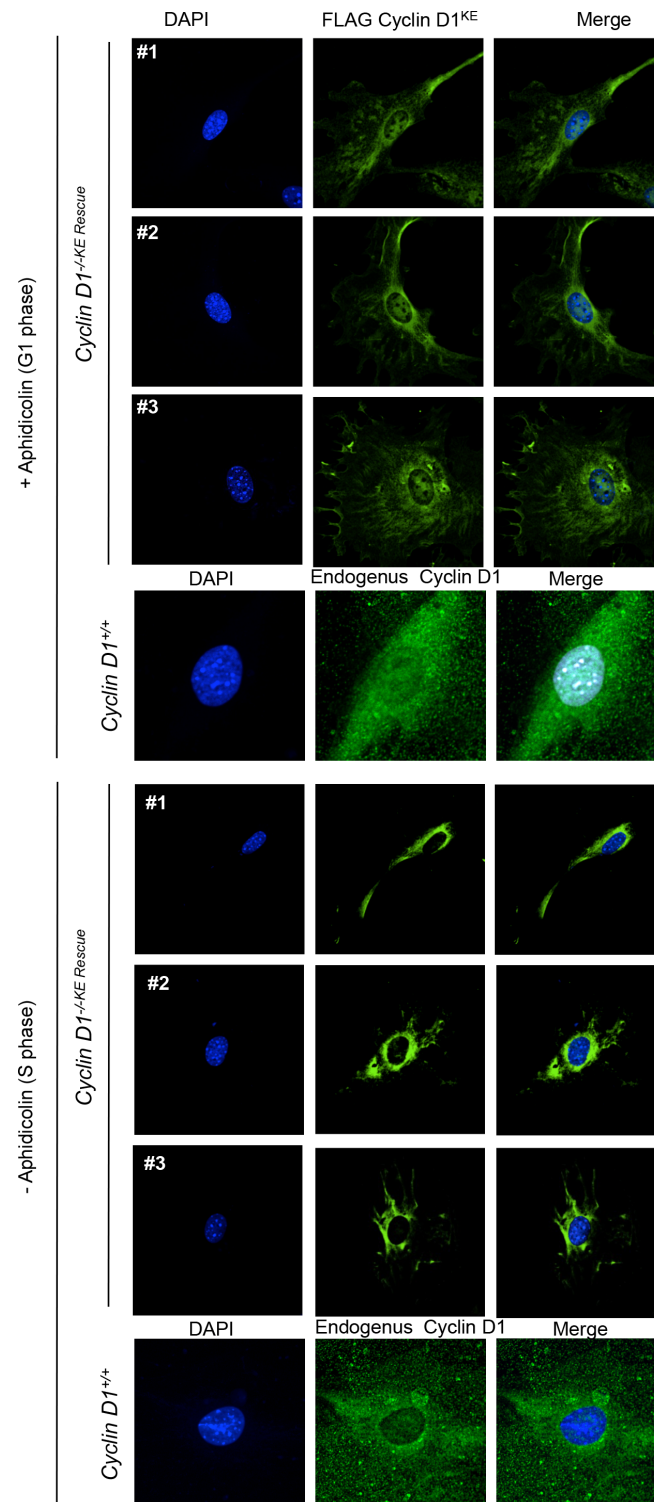

**Supplementary Figure 2: Compartmentalization of exogenous cyclin D1<sup>KE</sup> mimics endogenous cyclin D1 during transition from G1 to S phase.** Three representative images of *cyclin D1<sup>-/-</sup>KE Rescue* 3T3 fibroblast cells and one wild type 3T3 fibroblast cell arrested in G1 phase by treating with aphidicolin (+Aphidicolin (G1 phase)) for 16 hrs then released for 6 hours into S phase (-Aphidicolin (S phase)). Cells stained for DAPI (blue) and anti-FLAG (green) for exogenous cyclin D1<sup>KE</sup> and anti-cyclin D1 for endogenous cyclin D1.

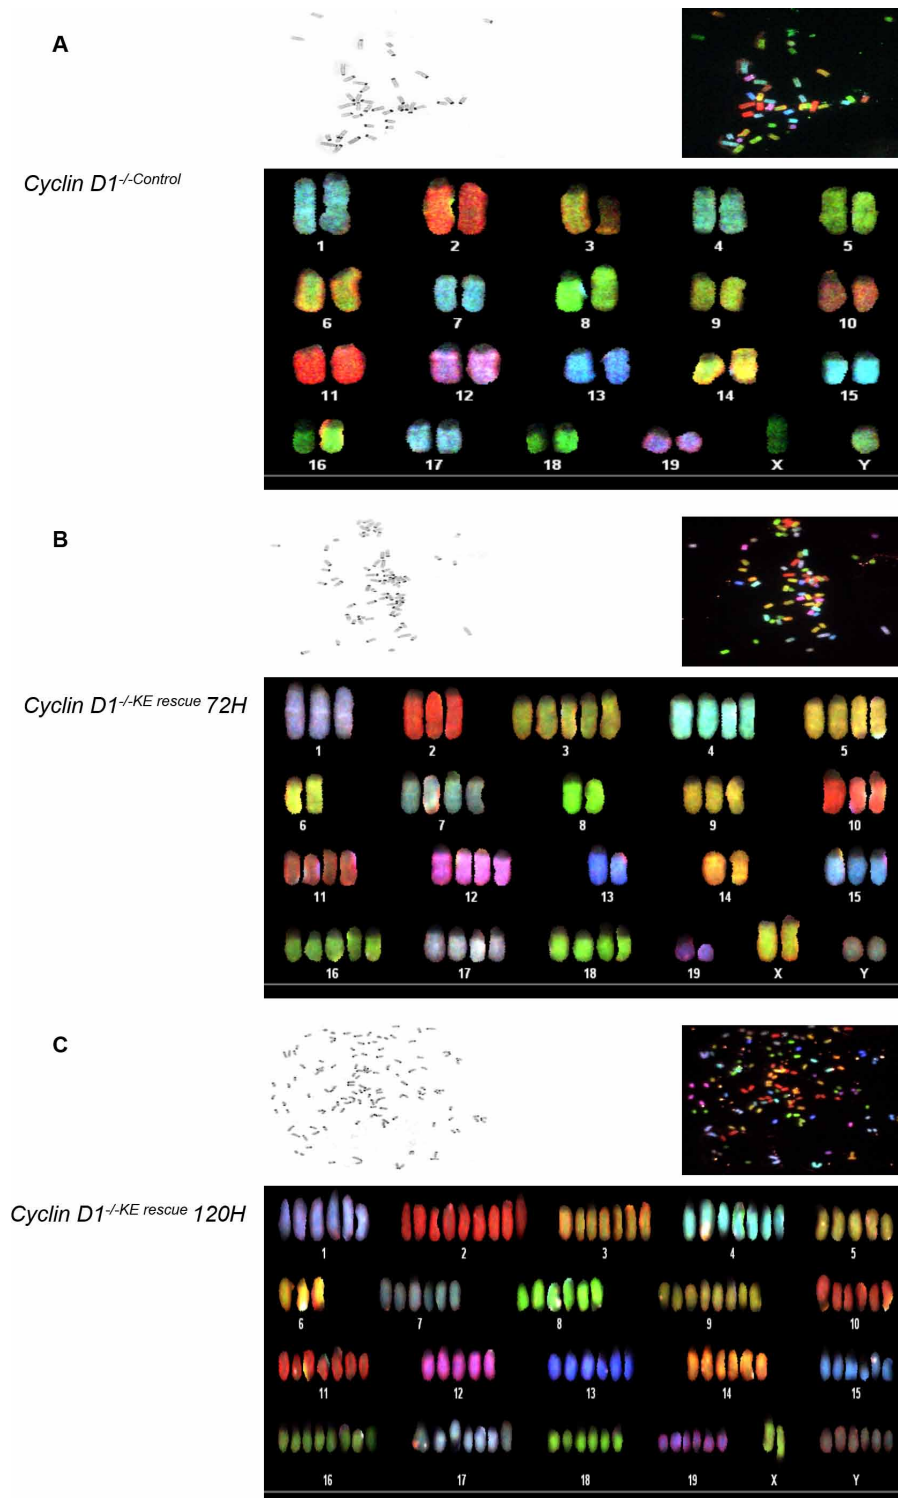

**Supplementary Figure 3: Enlarged representative metaphases from Spectral karyotyping (SKY).** Representative metaphases from Spectral karyotyping (SKY) on MEFs of *cyclin D1<sup>-/-</sup>-Control* at 72 hours (P6) (**A**), *cyclin D1<sup>-/-</sup>-KE<sup>Rescue</sup>* at 72 hours (P6) (**B**) and *cyclin D1<sup>-/-</sup>-KE<sup>Rescue</sup>* at 120 hours (**C**). Each panel contains the following images: inverted 4',6-diamidino-2-phenylindole (DAPI) image of the metaphase (top left corner), raw spectral image of the metaphase (top right) and classified metaphase of the same metaphase (lower panel).

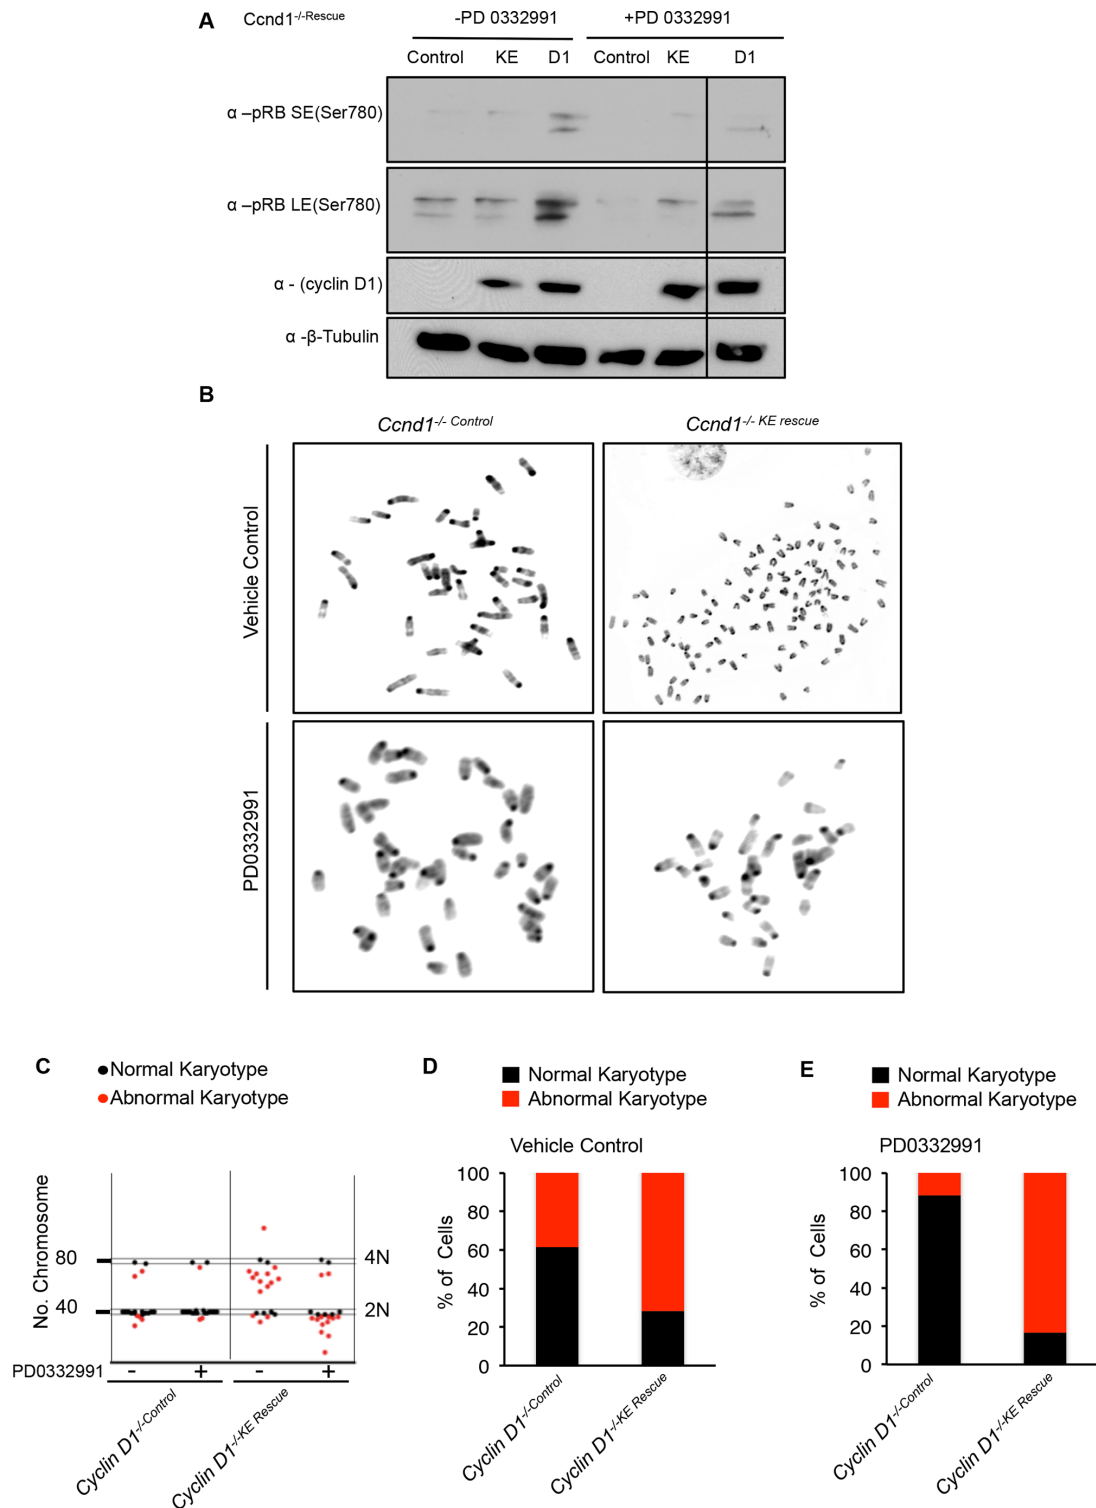

**Supplementary Figure 4: Antagonist treatment of *cyclin D1*<sup>-/-D1 Rescue</sup> and *cyclin D1*<sup>-/-KE Rescue</sup> MEF cells does not abrogate induction of aneuploidy. (A)** Western blot demonstrating phosphorylation of RB (S780) and exogenous cyclin D1 abundance in *cyclin D1*<sup>-/-Control</sup>, *cyclin D1*<sup>-/-KE Rescue</sup>, MEF cells and *cyclin D1*<sup>-/-D1 Rescue</sup> 3T3 fibroblast cells treated with vehicle control or 1 μM CDK4/6 antagonist-PD0332991 for 72 hrs **(B)** Representative metaphases from *cyclin D1*<sup>-/-Control</sup> and *cyclin D1*<sup>-/-KE Rescue</sup> MEF cell treated with control vehicle or CDK4/6 antagonist-PD0332991 for 72 hours. Metaphases were stained with DAPI and images converted to gray scale. **(C)** Scatter plots of chromosome numbers for *cyclin D1*<sup>-/-Control</sup> and *cyclin D1*<sup>-/-KE Rescue</sup> MEF cells treated with vehicle control or PD0332991. The parallel lines represent expected deviation from normal at 2N and 4N (+/- 2 chromosome) ( $n = 18$  metaphases per group). **(D)** Bar graphs showing the number of normal and abnormal karyotypes comparing *cyclin D1*<sup>-/-Control</sup> and *cyclin D1*<sup>-/-KE Rescue</sup> MEF cells at 72 hours from (D) vehicle treated and **(E)** PD0332991 treated MEF cells.

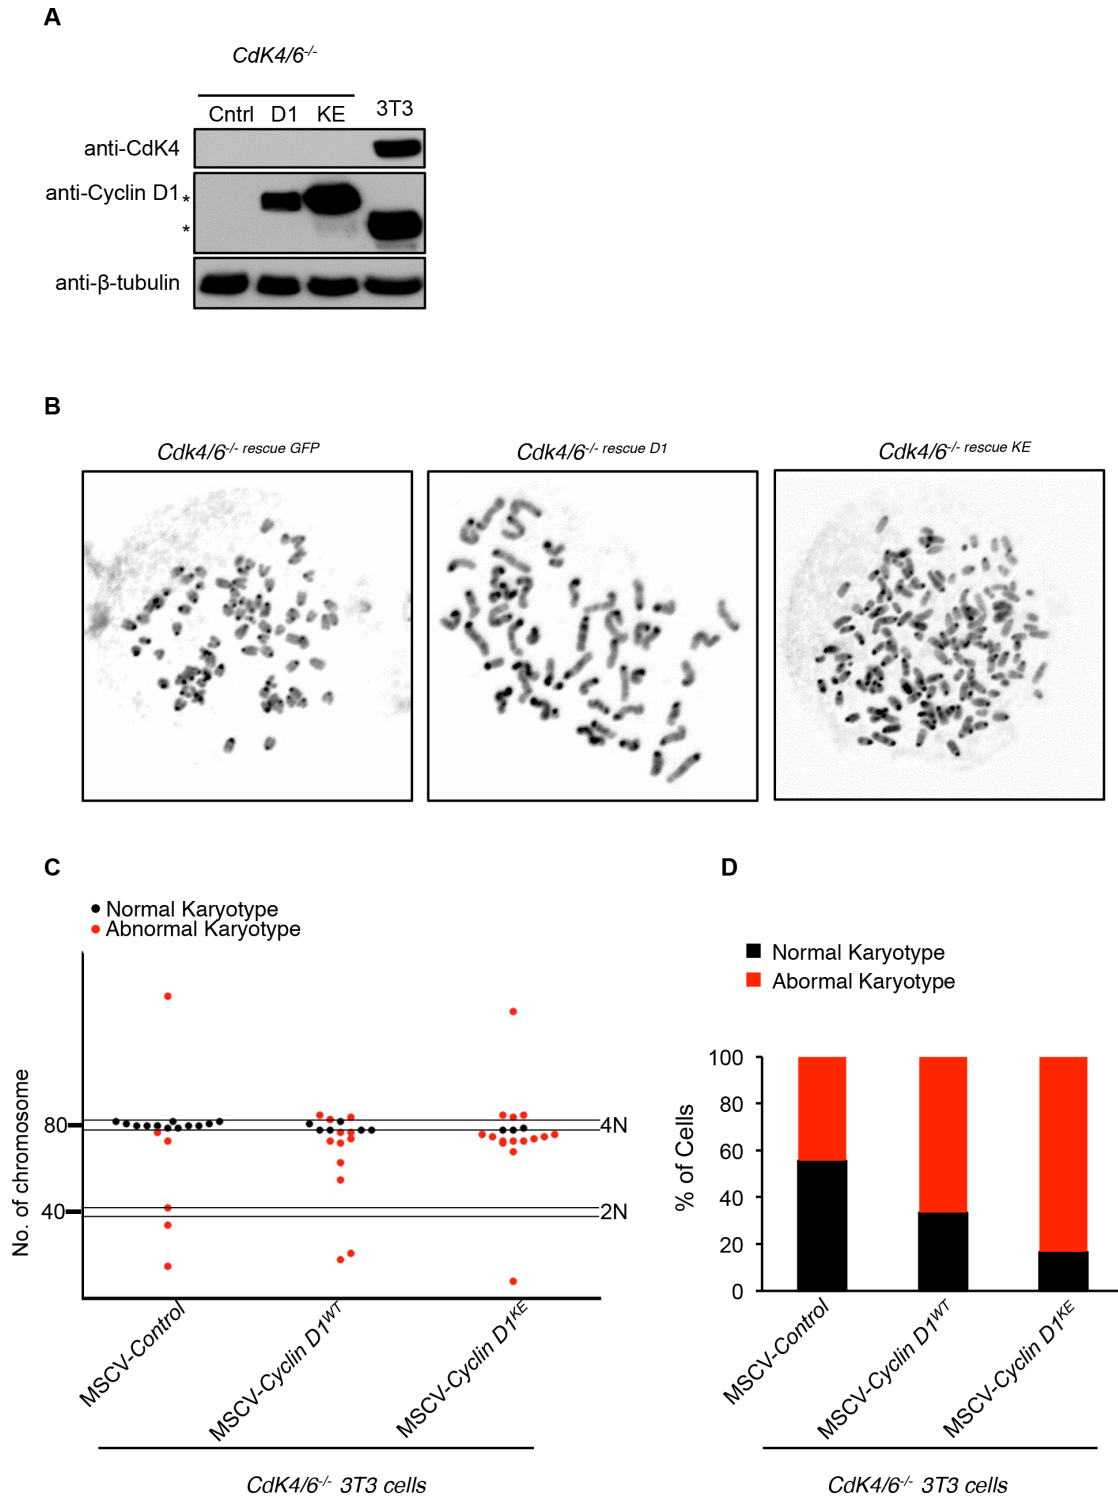

**Supplementary Figure 5: Cyclin D1 induces aneuploidy in *cdk4/6<sup>-/-</sup>* 3T3 cells.** (A) Western blot demonstrating *cdk4* and exogenous cyclin D1 abundance in *cdk4/6<sup>-/-</sup>* 3T3 fibroblast cells transduced with MSCV-Control, MSCV-Cyclin D1<sup>WT</sup> and MSCV-Cyclin D1<sup>KE</sup>. 3T3 wild type fibroblast cells represent positive control for *cdk4* abundance. (B) Representative metaphases from *cdk4/6<sup>-/-</sup>/control*, *cdk4/6<sup>-/-</sup>/cyclin D1<sup>WT</sup>* and *cdk4/6<sup>-/-</sup>/cyclin D1<sup>KE</sup>* 3T3 fibroblast cells. Metaphases were stained with DAPI and images converted to gray scale. (C) Scatter plots of chromosome numbers for *cdk4/6<sup>-/-</sup>/control*, *cdk4/6<sup>-/-</sup>/cyclin D1<sup>WT</sup>* and *cdk4/6<sup>-/-</sup>/cyclin D1<sup>KE</sup>* 3T3 fibroblast cells. The parallel lines represent expected deviation from normal at 2N and 4N (+/- 2 chromosome) (*n* = 15 metaphases per group). (D) Bar graph showing the number of normal and abnormal karyotypes comparing *cdk4/6<sup>-/-</sup>/control*, *cdk4/6<sup>-/-</sup>/cyclin D1<sup>WT</sup>* and *cdk4/6<sup>-/-</sup>/cyclin D1<sup>KE</sup>* 3T3 fibroblast cells at 72 hours.

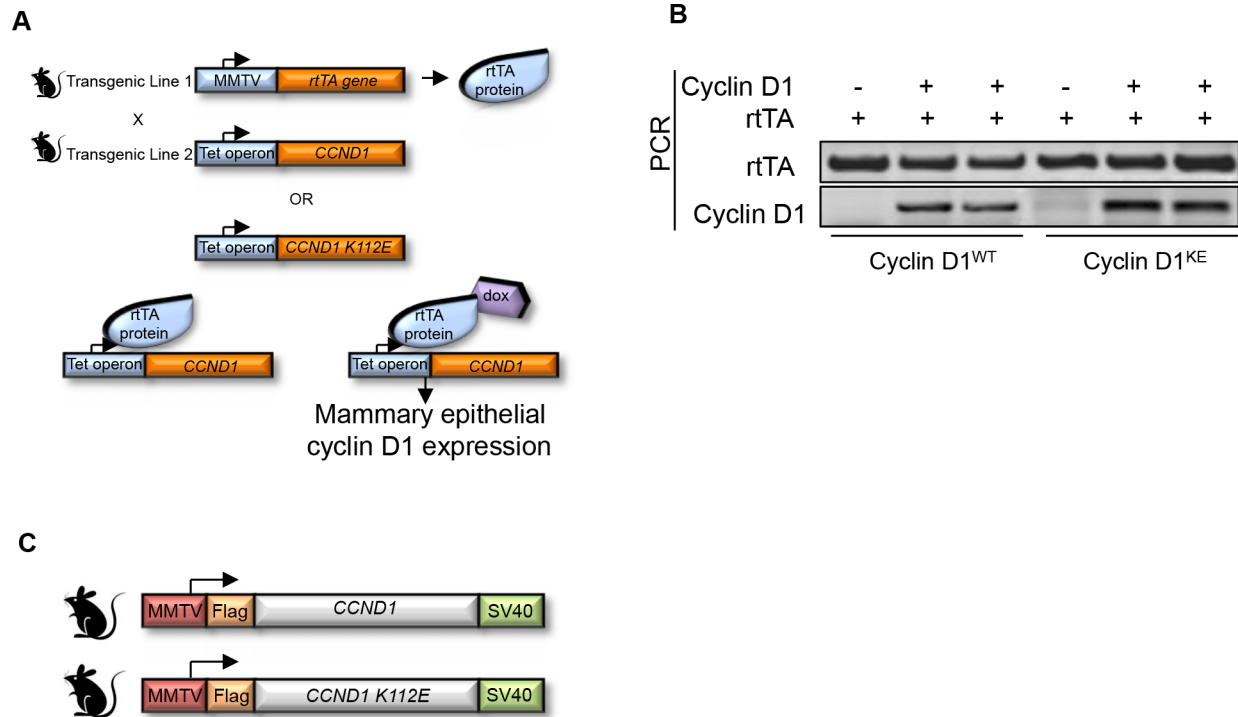

**Supplementary Figure 6: Overview of Tet-*CCND1*<sup>WT</sup> and Tet-*CCND1*<sup>KE</sup> mice.** (A) Schematic depiction of the tet-inducible mammary gland specific cyclin D1<sup>WT</sup> and cyclin D1<sup>KE</sup> transgenic lines. (B) Genotyping of Tet-*CCND1*<sup>WT</sup>, Tet-*CCND1*<sup>KE</sup>, and MMTV-rtTA transgenic mice. The cyclin D1<sup>WT</sup> portion of figure has been published previously<sup>20</sup>. (C) Schematic depiction of the mammary gland specific MMTV-*CCND1*<sup>WT</sup> and MMTV-*CCND1*<sup>KE</sup> transgenic lines.

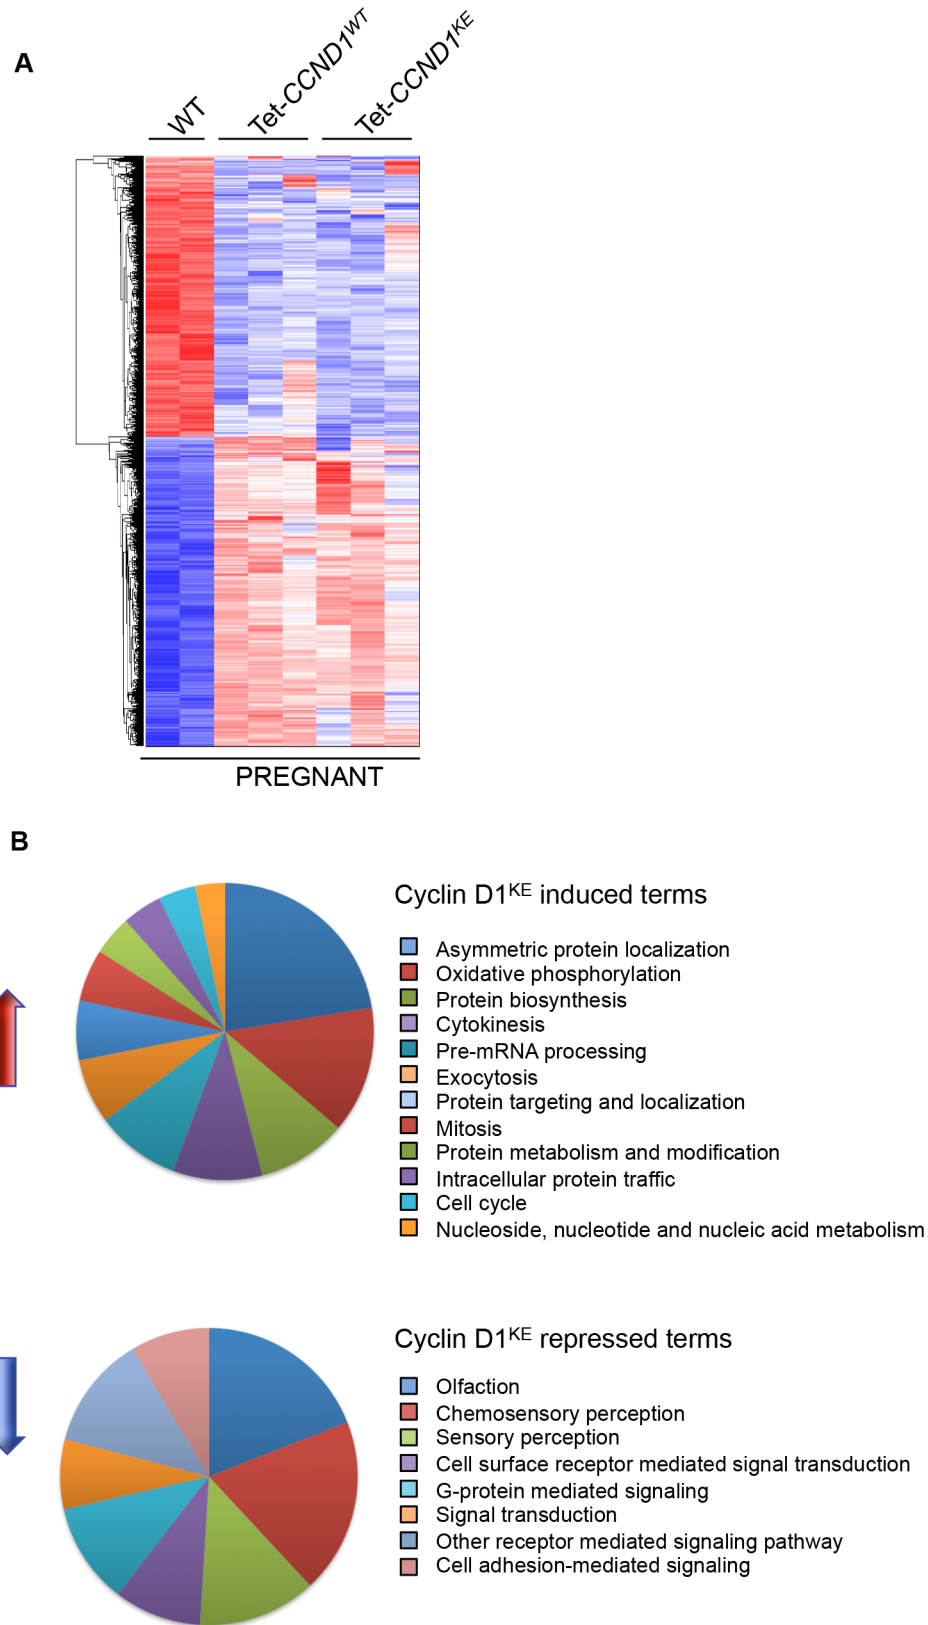

**Supplementary Figure 7: Microarray analysis of Tet-CCND1<sup>WT</sup> and Tet-CCND1<sup>KE</sup> mouse mammary glands.** (A) Hierarchical clustering of a superset of genes significantly differentially regulated between Tet-CCND1<sup>WT</sup> vs control and Tet-CCND1<sup>KE</sup> vs control mammary gland. (B) Pie chart representation of pathway analysis based on gene ontology (PANTHER-DAVID) of cyclin D1<sup>KE</sup> induced and repressed genes charted using an enrichment score.



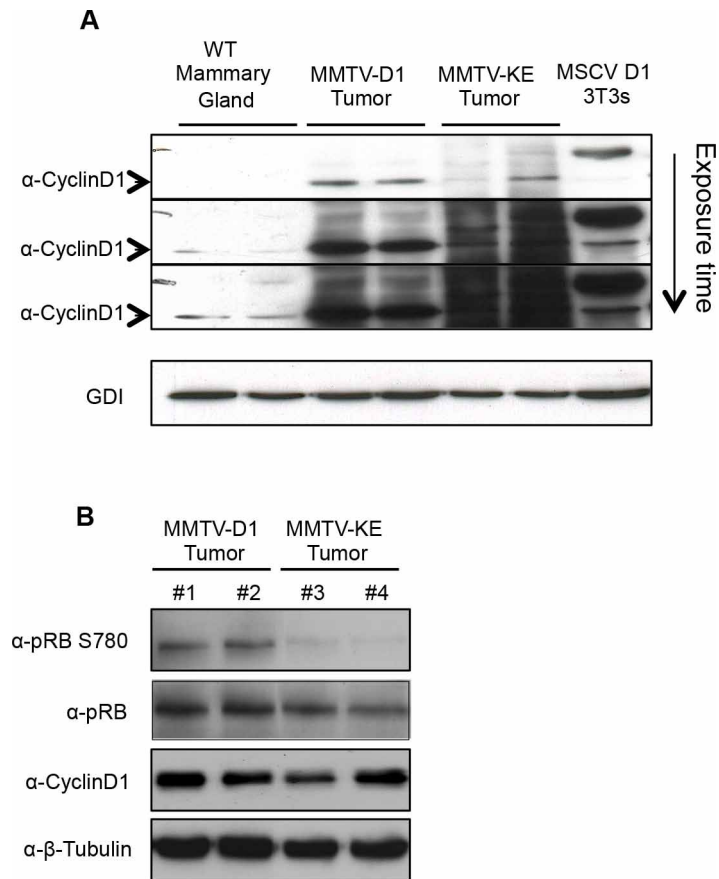

**Supplementary Figure 8: Relative abundance of cyclin D1 and pRB phosphorylation status in mammary gland tumors derived from MMTV-*CCND1*<sup>WT</sup> and MMTV-*CCND1*<sup>KE</sup> mice.** Western blot demonstrating (A) cyclin D1 abundance WT mammary gland compared to tumors from MMTV-*CCND1*<sup>WT</sup> and MMTV-*CCND1*<sup>KE</sup> mice. MSCV-cyclin D1<sup>WT</sup> from 3T3 fibroblast cells used as a control; migration slightly retarded due to 3xFLAG. The WT mammary gland and MMTV-D1 tumor lanes have been published previously. (B) Western blot analysis of pRB S780 phosphorylation status in tumors from MMTV-*CCND1*<sup>WT</sup> and MMTV-*CCND1*<sup>KE</sup> mice.

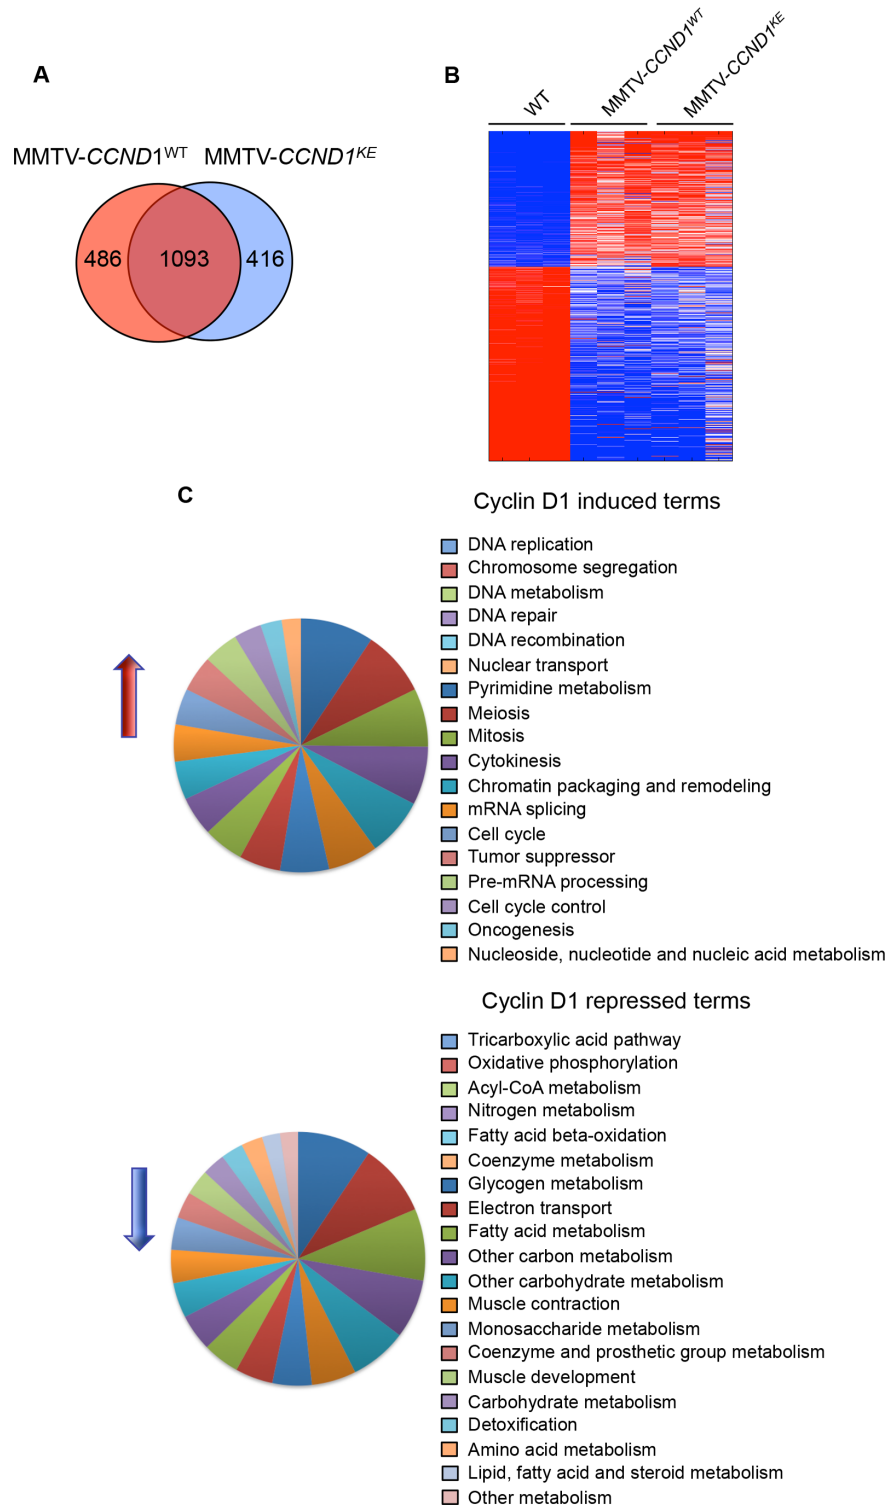

**Supplementary Figure 9: Microarray analysis of MMTV-CCND1<sup>WT</sup> and MMTV-CCND1<sup>KE</sup> mouse mammary tumors. (A)** Venn diagram representing genes differentially regulated by MMTV-CCND1<sup>WT</sup> ( $n = 3$ ) and MMTV-CCND1<sup>KE</sup> ( $n = 3$ ) and visualized by **(B)** Hierarchical clustering of 1995 significantly regulated genes ( $P \leq 0.01$  and fold change  $> 2$ ). **(C)** Pie chart representation of functional annotation clustering (DAVID) of cyclin D1<sup>KE</sup> induced and repressed terms based on percentage enrichment score of the top hits.

**Supplementary Table 1: Histological analysis of tumors from wild type FVB, MMTV-Cyclin D1<sup>WT</sup> and MMTV-Cyclin D1<sup>KE</sup> Mice**

| <b>WT FVB Mice (6 tumors)</b>                       |  |
|-----------------------------------------------------|--|
| Adenocarcinoma with squamous differentiation        |  |
| Papillary adenocarcinoma                            |  |
| Partially necrotic secretory adenocarcinoma         |  |
| EMT-phenotype                                       |  |
| Complex adenoacanthoma                              |  |
| EMT-phenotype                                       |  |
|                                                     |  |
| <b>MMTV-Cyclin D1<sup>WT</sup> Mice (10 tumors)</b> |  |
| Keratoacanthoma                                     |  |
| EMT-phenotype                                       |  |
| Keratoacanthoma                                     |  |
| Adenosquamous AC                                    |  |
| Adenosquamous AC and Spindle cell tumor             |  |
| Adenocarcinoma                                      |  |
| Papillary Adenocarcinoma                            |  |
| Adenosquamous AC (Keratoacanthoma)                  |  |
| Lobular hyperplasia and secretory adenocarcinoma    |  |
| EMT-phenotype                                       |  |
|                                                     |  |
| <b>MMTV-Cyclin D1<sup>KE</sup> Mice (7 tumors)</b>  |  |
| Partially necrotic adenocarcinoma                   |  |
| Adenocarcinoma                                      |  |
| Papillary adenocarcinoma                            |  |
| EMT-phenotype                                       |  |
| Complex adenoacanthoma                              |  |
| Papillary adenocarcinoma                            |  |
| EMT-phenotype                                       |  |

**Supplementary Table 2: Interval data from cyclin D1<sup>KE</sup> associated genomic regions generated by ChIP-Seq**

| <b>Description</b>                                                             | <b>Act Regions</b> |
|--------------------------------------------------------------------------------|--------------------|
| Number of Intervals Converted                                                  | 4296               |
| Number of Intervals within -10000/+10000 bp of NCBI Genes                      | 3494               |
| Number of Intervals NOT within -10000/+10000 bp of NCBI Genes                  | 802                |
| Number of NCBI Genes with Intervals within -10000/+10000 bp                    | 4446               |
| Number of Intervals within Promoter Region (-7500/+2500 bp of NCBI Gene Start) | 3305               |
| Number of NCBI Genes with intervals in Promoters (-7500/2500 bp of start)      | 3780               |

**Supplementary Table 3: Full list of transcription factor binding sites identified in cyclin DIKE peak interval sequences**

| Transcription Factor Name | P-value  | Experimental Hits |
|---------------------------|----------|-------------------|
| SP1                       | 4.70E-07 | 1717              |
| RREB1                     | 2.64E-06 | 1233              |
| GABPA                     | 2.20E-08 | 810               |
| EWSR1-FLI1                | 9.78E-07 | 805               |
| ETS1                      | 3.82E-07 | 729               |
| ELK4                      | 7.83E-08 | 551               |
| FEV                       | 8.19E-08 | 521               |
| NR2F1                     | 2.41E-06 | 512               |
| MZF1_1-4                  | 3.06E-07 | 489               |
| CTCF                      | 1.29E-07 | 483               |
| ZFX                       | 1.90E-07 | 477               |
| ELK1                      | 8.06E-08 | 471               |
| GATA2                     | 7.40E-07 | 471               |
| NFYA                      | 6.12E-08 | 422               |
| MYF                       | 6.45E-08 | 418               |
| PLAG1                     | 5.06E-07 | 384               |
| ZNF143                    | 4.06E-07 | 382               |
| EGR1                      | 2.25E-08 | 378               |
| ZEB1                      | 1.29E-07 | 351               |
| IRF1                      | 1.85E-06 | 343               |
| ARNT                      | 6.21E-07 | 337               |
| USF1                      | 6.21E-07 | 337               |
| NR4A1                     | 1.03E-06 | 316               |
| PAX5                      | 1.50E-07 | 304               |
| CREB1                     | 9.10E-08 | 299               |
| STAT3                     | 3.15E-07 | 294               |
| SPIB                      | 3.76E-08 | 290               |
| NHLH1                     | 4.61E-07 | 289               |
| ESR1                      | 1.65E-07 | 274               |
| PPARG::RXRA               | 6.42E-08 | 274               |
| SPI1                      | 5.73E-07 | 267               |
| STAT1                     | 1.51E-07 | 261               |
| REST                      | 5.00E-08 | 255               |
| FOXD3                     | 1.09E-07 | 244               |
| MZF1_5-13                 | 1.51E-07 | 233               |
| NFIC                      | 7.09E-08 | 219               |

(Continued)

| Transcription Factor Name | P-value  | Experimental Hits |
|---------------------------|----------|-------------------|
| MAX                       | 1.02E-07 | 217               |
| YY1                       | 1.41E-07 | 204               |
| ESR2                      | 2.57E-07 | 186               |
| MYCN                      | 7.59E-08 | 176               |
| REL                       | 7.61E-08 | 174               |
| ESRRB                     | 7.10E-07 | 168               |
| HNF4A                     | 2.37E-07 | 165               |
| RUNX1                     | 1.80E-08 | 161               |
| NFE2L1::MAFG              | 6.41E-07 | 157               |
| FOXA1                     | 2.92E-07 | 144               |
| RXR::RAR_DR5              | 4.72E-08 | 141               |
| HAND1::TCFE2A             | 1.00E-08 | 140               |
| NFKB1                     | 6.46E-08 | 137               |
| ARID3A                    | 1.07E-06 | 136               |
| FOXO3                     | 1.37E-07 | 136               |
| MYC::MAX                  | 2.33E-07 | 132               |
| PAX2                      | 1.95E-08 | 130               |
| TP53                      | 3.05E-07 | 121               |
| NF-KAPPAB                 | 2.05E-08 | 120               |
| NR2E3                     | 2.99E-08 | 120               |
| IRF2                      | 1.00E-08 | 118               |
| GFI                       | 2.75E-07 | 117               |
| KLF4                      | 4.63E-07 | 116               |
| SPZ1                      | 9.76E-08 | 115               |
| RELA                      | 7.28E-08 | 112               |
| MAFB                      | 3.95E-08 | 111               |
| PPARG                     | 1.00E-08 | 111               |
| TAL1::TCF3                | 4.13E-02 | 108               |
| MYC                       | 6.75E-08 | 107               |
| AP1                       | 8.31E-08 | 106               |
| NFE2L2                    | 1.25E-05 | 103               |
| AR                        | 1.00E-08 | 101               |
| FOXA2                     | 1.12E-05 | 101               |
| MEF2A                     | 2.24E-07 | 101               |
| E2F1                      | 2.36E-06 | 99                |
| NFATC2                    | 1.59E-05 | 90                |
| INSM1                     | 2.47E-03 | 89                |

(Continued)

| Transcription Factor Name | P-value  | Experimental Hits |
|---------------------------|----------|-------------------|
| NR1H2::RXRA               | 4.96E-04 | 88                |
| RORA_1                    | 1.41E-07 | 88                |
| EVI1                      | 1.29E-02 | 87                |
| SOX2                      | 1.19E-04 | 87                |
| SRY                       | 2.12E-07 | 87                |
| RXRA::VDR                 | 7.53E-07 | 86                |
| GATA3_1                   | 1.00E-08 | 81                |
| NR3C1                     | 1.27E-07 | 80                |
| GATA1                     | 2.60E-07 | 78                |
| SOX5                      | 2.23E-06 | 78                |
| NKX2-5                    | 2.00E-06 | 76                |
| FOXF2                     | 7.68E-03 | 75                |
| DDIT3::CEBPA              | 4.84E-04 | 73                |
| MIZF                      | 1.00E-08 | 72                |
| FOXL1                     | 1.17E-05 | 66                |
| MYB                       | 1.04E-07 | 66                |
| SOX17                     | 8.70E-03 | 65                |
| HIF1A::ARNT               | 4.34E-04 | 64                |
| HNF1A                     | 2.39E-03 | 63                |
| LHX3                      | 1.90E-02 | 62                |
| NKX3-2                    | 8.93E-04 | 62                |
| CEBPA                     | 2.73E-08 | 61                |
| PAX6                      | 3.81E-03 | 59                |
| TAL1::GATA1               | 4.12E-04 | 59                |
| SOX9                      | 5.15E-06 | 58                |
| FOXC1                     | 3.81E-05 | 55                |
| HLF                       | 6.66E-08 | 54                |
| NOBOX                     | 1.07E-06 | 54                |
| FOXD1                     | 2.14E-05 | 53                |
| HNF1B                     | 2.61E-06 | 53                |
| RORA_2                    | 3.55E-04 | 52                |
| SRF                       | 1.35E-04 | 51                |
| T                         | 2.91E-02 | 51                |
| BRCA1                     | 8.58E-05 | 48                |
| PAX4                      | 1.34E-04 | 48                |
| PRRX2                     | 2.62E-03 | 45                |
| HOXA5                     | 1.90E-02 | 43                |
| PDX1                      | 7.33E-03 | 39                |
| HLTF                      | 3.41E-02 | 35                |

**Supplementary Dataset 1: Full list of genes regulated by cyclin D1<sup>WT</sup> and cyclin D1<sup>KE</sup> in mammary gland of transgenic mice**

**Supplementary Dataset 2: Full gene list of the mammary tumors for MMTV-cyclin D1<sup>KE</sup> and MMTV-cyclin D1<sup>WT</sup> mice, includes list of genes common to the two sets**

**Supplementary Dataset 3: Complete list of cyclin D1<sup>KE</sup> bound genes by ChIP-Seq analysis**
